# Supplementary material
Source: HighWire-hosted journal article supplement (http://ajnr-stage2.highwire.org/highwire/filestream/107586/field_highwire_adjunct_files/0/0970.pdf)
Supplement: 0970.pdf [file 0970.pdf]

## SUPPLEMENT

**Table.** Clinical characteristics of 4 patients with co-existent intracranial dural AV fistula and steno-occlusive disease

| Case # | Age | Sex | Ethnicity | Symptoms                                      | AVF Location and Cognard Type                                                                                                                                                                                                                                              | Intracranial Steno-occlusive Changes | AVF Treatment                    | Steno-occlusive Changes Treatment      |
|--------|-----|-----|-----------|-----------------------------------------------|----------------------------------------------------------------------------------------------------------------------------------------------------------------------------------------------------------------------------------------------------------------------------|--------------------------------------|----------------------------------|----------------------------------------|
| 1      | 57  | M   | Asian     | Myelopathy                                    | Craniocervical junction – Supplied by L PICA branches, draining into anterior and posterior spinal veins; Cognard Type V                                                                                                                                                   | Moyamoya-like changes in R M1        | Surgical ligation AVF            | Aspirin 325 mg daily                   |
| 2      | 63  | M   | Asian     | Ischemic stroke with recurrent L MCA infarcts | Sphenoparietal – supplied primarily by enlarged posterior branch of left MMA, draining into two left hemispheric cortical veins including the vein of Trolard and then into the superior sagittal sinus; Cognard Type IV                                                   | L ICA Occlusion and R ICA Stenosis   | Embolization + Surgical Ligation | L STA-MCA bypass + Aspirin 81 mg daily |
| 3      | 74  | F   | Asian     | Papilledema                                   | Transverse/Sigmoid – arterialization of transverse and sigmoid sinuses, drainage into the transverse sinus across the torcula into an arterialized R transverse/sigmoid sinus, reflux into superior sagittal sinus, inferior anastomotic vein of Labbe; Cognard Type IIa+b | L ICA Occlusion                      | Embolization                     | Aspirin 81 mg daily                    |
| 4      | 42  | M   | Asian     | Transient Headache                            | Ethmoidal – arterial supply through the ophthalmic arteries, draining into an enlarged R frontal cortical vein that eventually empties into the superior sagittal sinus; Cognard Type IV                                                                                   | R M1                                 | Observation                      | Aspirin 81 mg daily                    |

F = female; M = male; ICA = internal carotid artery; M1 = 1<sup>st</sup> segment of middle cerebral artery; AVF = arteriovenous fistula; STA = superficial temporal artery; MCA = middle cerebral artery
